# Supplementary material for: Resilience in families in which a parent has been retrenched
Source: Springer Nature journal article supplement (doi:10.1038/s41531-022-00437-1), 2000-12-01
Supplement: MOESM1 [file 41531_2022_437_MOESM1_ESM.pdf]

# Diffusion along perivascular spaces as marker for impairment of glymphatic system in Parkinson's disease

## Supplementary materials

Supplementary Table 1 Biomarkers of glymphatic system in the subgroups of patients with different onset sides.

|                                  | Right-onset PD (n=40) | Left-onset PD (n=47) | p value |
|----------------------------------|-----------------------|----------------------|---------|
| <b>DTI-ALPS<sub>r</sub></b>      | 1.39 ± 0.22           | 1.40 ± 0.23          | 0.80    |
| <b>DTI-ALPS<sub>l</sub></b>      | 1.38 ± 0.28           | 1.38 ± 0.28          | 0.98    |
| <b>PVS BG<sub>r</sub> number</b> | 13.80 ± 5.76          | 16.19 ± 9.14         | 0.28    |
| <b>PVS BG<sub>l</sub> number</b> | 13.36 ± 5.91          | 13.38 ± 9.26         | 0.40    |
| <b>PVS BG<sub>r</sub> volume</b> | 54.77 ± 29.28         | 67.09 ± 47.09        | 0.43    |
| <b>PVS BG<sub>l</sub> volume</b> | 50.59 ± 29.40         | 60.35 ± 48.22        | 0.57    |

Results are expressed as means ± SD for the continuous variables.

PD, Parkinson's disease; DTI-ALPS<sub>r</sub>, right-hemispheric diffusion tensor image analysis along the perivascular space; DTI-ALPS<sub>l</sub>, left-hemispheric DTI-ALPS; PVS, perivascular space; BG<sub>r</sub>, right-hemispheric basal ganglia; BG<sub>l</sub>, left-hemispheric BG.
